# Supplementary material for: Management of severe arterial hypertension associated with serotonin syndrome: a case report analysis based on systematic review techniques
Source: PubMed Central journal article supplement — Ther Adv Psychopharmacol. 2019 Mar 11;9:2045125318818814. doi: 10.1177/2045125318818814 (PMC6413434; doi:10.1177/2045125318818814), 2019-03-11
Supplement: Appendix_1_Diagnostic_criteria_for_Serotonin_Syndrome.pdf [file Appendix_1_Diagnostic_criteria_for_Serotonin_Syndrome.pdf]

**Appendix 1: Diagnostic criteria for Serotonin Syndrome**

| Sternbach 1991<br>>3 of the following                                                                                                                                                                                                                                                                                      |                                                                                                                                                                                                                                                                                                                                                                                                                                                                                                                                                                                                                  | Radomski 2000<br>4 major or 3 major and 2 minor                              |                          | Hunter Serotonin<br>Toxicity Criteria 2003                                                                                                                                                                                                                                                                                                                                                                                                                |
|----------------------------------------------------------------------------------------------------------------------------------------------------------------------------------------------------------------------------------------------------------------------------------------------------------------------------|------------------------------------------------------------------------------------------------------------------------------------------------------------------------------------------------------------------------------------------------------------------------------------------------------------------------------------------------------------------------------------------------------------------------------------------------------------------------------------------------------------------------------------------------------------------------------------------------------------------|------------------------------------------------------------------------------|--------------------------|-----------------------------------------------------------------------------------------------------------------------------------------------------------------------------------------------------------------------------------------------------------------------------------------------------------------------------------------------------------------------------------------------------------------------------------------------------------|
|                                                                                                                                                                                                                                                                                                                            |                                                                                                                                                                                                                                                                                                                                                                                                                                                                                                                                                                                                                  | Major                                                                        | Minor                    |                                                                                                                                                                                                                                                                                                                                                                                                                                                           |
| Mental symptoms:                                                                                                                                                                                                                                                                                                           |                                                                                                                                                                                                                                                                                                                                                                                                                                                                                                                                                                                                                  |                                                                              |                          |                                                                                                                                                                                                                                                                                                                                                                                                                                                           |
| Mental status changes<br>(confusion, hypomania)                                                                                                                                                                                                                                                                            | Semicoma/coma<br>Consciousness<br>impairment<br>Elevated mood                                                                                                                                                                                                                                                                                                                                                                                                                                                                                                                                                    |                                                                              | Insomnia<br>Restlessness | Agitation <sup>1</sup>                                                                                                                                                                                                                                                                                                                                                                                                                                    |
| Agitation                                                                                                                                                                                                                                                                                                                  |                                                                                                                                                                                                                                                                                                                                                                                                                                                                                                                                                                                                                  |                                                                              |                          |                                                                                                                                                                                                                                                                                                                                                                                                                                                           |
| Neurological / neuromuscular symptoms:                                                                                                                                                                                                                                                                                     |                                                                                                                                                                                                                                                                                                                                                                                                                                                                                                                                                                                                                  |                                                                              |                          |                                                                                                                                                                                                                                                                                                                                                                                                                                                           |
| Myoclonus<br>Hyperreflexia                                                                                                                                                                                                                                                                                                 | Myoclonus<br>Hyperreflexia<br>Rigidity                                                                                                                                                                                                                                                                                                                                                                                                                                                                                                                                                                           |                                                                              |                          | Hyperreflexia <sup>4</sup><br>Hypertonic/rigidity <sup>5</sup><br>Spontaneous clonus<br>Inducible clonus <sup>2</sup><br>Ocular clonus <sup>2</sup>                                                                                                                                                                                                                                                                                                       |
| Tremor<br>Incoordination<br>Shivering                                                                                                                                                                                                                                                                                      | Tremor<br>Shivering                                                                                                                                                                                                                                                                                                                                                                                                                                                                                                                                                                                              | Akathisia<br>Uncoordination                                                  | Dilated pupils           | Tremor <sup>3</sup>                                                                                                                                                                                                                                                                                                                                                                                                                                       |
| Vegetative symptoms:                                                                                                                                                                                                                                                                                                       |                                                                                                                                                                                                                                                                                                                                                                                                                                                                                                                                                                                                                  |                                                                              |                          |                                                                                                                                                                                                                                                                                                                                                                                                                                                           |
| Fever<br>Diaphoresis<br>Diarrhea                                                                                                                                                                                                                                                                                           | Fever<br>Sweating                                                                                                                                                                                                                                                                                                                                                                                                                                                                                                                                                                                                | Diarrhoea<br>Tachycardia<br><b>Hyper-/<br/>hypotension</b><br>Tachy-/dyspnea |                          | Temperature > 38°C <sup>6</sup>                                                                                                                                                                                                                                                                                                                                                                                                                           |
| <ul style="list-style-type: none"> <li>• Addition or increase of a known serotonergic agent to an established medication regimen</li> <li>• Other etiologies have been ruled out</li> <li>• A neuroleptic had not been started or increased in dosage prior to the onset of the signs and symptoms listed above</li> </ul> | <ol style="list-style-type: none"> <li>1. Co-occurrence with the addition or increase in a known serotonergic agent (to an established treatment regime)</li> <li>2. Clinical features described in the first criterion were not an integral part of the underlying psychiatric disorder prior to commencing the serotonergic agent.</li> <li>3. Other aetiologies (e.g. infectious, metabolic or endocrine, substance abuse or withdrawal) have been ruled out.</li> <li>4. A neuroleptic drug had not been started or increased in dosage prior to the onset of the signs and symptoms listed above</li> </ol> |                                                                              |                          | <sup>1</sup> in combination with diaphoresis .AND. [ocular .OR. inducible clonus]<br><sup>2</sup> in combination with [agitation .OR. diaphoresis]<br><sup>3</sup> in combination with hyperreflexia<br><sup>4</sup> in combination with tremor<br><sup>5</sup> in combination with temperature > 38°C .AND. [ocular clonus .OR. inducible clonus]<br><sup>6</sup> in combination with Hypertonicity/rigidity .AND. [ocular clonus .OR. inducible clonus] |
