# Supplementary material for: Management of severe arterial hypertension associated with serotonin syndrome: a case report analysis based on systematic review techniques
Source: PubMed Central journal article supplement — Ther Adv Psychopharmacol. 2019 Mar 11;9:2045125318818814. doi: 10.1177/2045125318818814 (PMC6413434; doi:10.1177/2045125318818814), 2019-03-11
Supplement: Appendix_3_Laboratory_results.pdf [file Appendix_3_Laboratory_results.pdf]

### Appendix 3: Laboratory results

|                                    | Unit   | Result      | Reference |
|------------------------------------|--------|-------------|-----------|
| Na                                 | mmol/L | 142         | 137 - 145 |
| K                                  | mmol/L | <b>8.7</b>  | 3.6 - 4.6 |
| Creatinine                         | µmol/L | <b>2188</b> | 45 - 90   |
| Urea                               | mmol/L | <b>64.9</b> | 3.1 - 7.9 |
| Creatinkinase                      | µkat/L | 2.94        | < 3.5     |
| Troponin (high-sensitive)          | nmol/L | <b>210</b>  | 0 - 15    |
| Myoglobin                          | µg/L   | <b>781</b>  | 25-58     |
| P                                  | mmol/L | <b>4.7</b>  | 0.8 - 1.5 |
| CRP                                | mg/L   | <b>28</b>   | <10       |
| <i>Arterial blood gas analysis</i> |        |             |           |
| pH                                 |        | <b>7.09</b> | 7.35-7.45 |
| pCO2                               | kPa    | <b>2.6</b>  | 4.6 - 6.0 |
| Standard bicarbonate               | mmol/L | <b>5.2</b>  | 22 - 27   |
| Base excess                        | mmol/L | <b>-22</b>  | + - 3     |
| <i>Urine analysis</i>              |        |             |           |
| Protein                            | g/L    | <b>3.1</b>  | < 0.03    |
