# Supplementary material for: Management of severe arterial hypertension associated with serotonin syndrome: a case report analysis based on systematic review techniques
Source: PubMed Central journal article supplement — Ther Adv Psychopharmacol. 2019 Mar 11;9:2045125318818814. doi: 10.1177/2045125318818814 (PMC6413434; doi:10.1177/2045125318818814), 2019-03-11
Supplement: Appendix_4_Publications_included_FINAL.pdf [file Appendix_4_Publications_included_FINAL.pdf]

## Appendix 4

### Articles with cases included in the analysis

1. Adan-Manes J, Novalbos J, Lopez-Rodriguez R, et al. Lithium and venlafaxine interaction: a case of serotonin syndrome. *J Clin Pharm Ther.* 2006, p. 397-400.
2. Adler AR, Charnin JA and Quraishi SA. Serotonin Syndrome: The Potential for a Severe Reaction Between Common Perioperative Medications and Selective Serotonin Reuptake Inhibitors. *AA Case Rep.* 2015; 5: 156-9.
3. Agell I. Serotonin syndrome resulting from switching antidepressants in a patient with chronic pain. A case report. *Eur Psychiatry.* 2008; 23: S199-S.
4. Ailawadhi S, Sung KW, Carlson LA, et al. Serotonin syndrome caused by interaction between citalopram and fentanyl. *J Clin Pharm Ther.* 2007; 32: 199-202.
5. Alkhatib AA, Peterson KA and Tuteja AK. Serotonin syndrome as a complication of fentanyl sedation during esophagogastroduodenoscopy. *Dig Dis Sci.* 2010; 55: 215-6.
6. Alnwick GM. Misdiagnosis of serotonin syndrome as fibromyalgia and the role of physical therapists. *Phys Ther.* 2008; 88: 757-65.
7. Altman CS and Jahangiri MF. Serotonin syndrome in the perioperative period. *Anesth Analg.* 2010; 110: 526-8.
8. Altman EM and Manos GH. Serotonin syndrome associated with citalopram and meperidine. *Psychosomatics.* 2007; 48: 361-3.
9. Alvarez-Perez FJ, Roca M, Martorell E, et al. [Serotonin syndrome: report of two cases and review of the literature]. *Rev Neurol.* 2005; 40: 159-62.
10. Ameen S and Praharaj SK. Functional auditory hallucinations in a case of serotonin syndrome. *J Neuropsychiatry Clin Neurosci.* 2013; 25: E60-1.
11. Aminiahidasthi H, Shafiee S, Mousavi SJ, et al. Tramadol Pill Alone May Cause Serotonin Syndrome. *Chin Med J (Engl).* 2016; 129: 877-8.
12. Anonymous. Venlafaxine + tramadol: serotonin syndrome. *Prescrire Int.* 2004; 13: 57.
13. Anonymous. Fluoxetine + hydromorphone: serotonin syndrome? *Prescrire Int.* 2004; 13: 57.
14. Ansermot N, Hodel PF and Eap CB. Serotonin toxicity after addition of mirtazapine to escitalopram. *J Clin Psychopharmacol.* 2014; 34: 540-1.
15. Armitage MC, Woolfield KI and Page CB. Serotonin toxicity caused by the interaction of fentanyl and serotonergic medications. *Emerg Med Australas.* 2016; 28: 119-20.

16. Atasoy N, Ozturk D and Konuk N. Serotonin syndrome resulting from coadministration of venlafaxine, and mirtazapine. *Eur Neuropsychopharmacol.* 2008; 18: S309-S10.
17. Attar-Herzberg D, Apel A, Gang N, et al. The serotonin syndrome: initial misdiagnosis. *Isr Med Assoc J.* 2009, p. 367-70.
18. Bakim B, Sertcelik S and Tankaya O. A Case of Serotonin Syndrome with Antidepressant Treatment and Concomitant use of The Herbal Remedy (Peganum Harmala). *Klinik Psikofarmakoloji Bulteni-Bulletin of Clinical Psychopharmacology.* 2012; 22: 359-61.
19. Baptista G, Eiden C, Monguillot P, et al. Serotonin syndrome during treatment with low dose of escitalopram associated with miconazole mucoadhesive tablet: a suspected drug interaction. *Int Psychogeriatr.* 2012; 24: 845-7.
20. Batista M, Dugernier T, Simon M, et al. The spectrum of acute heart failure after venlafaxine overdose. *Clin Toxicol (Phila).* 2013; 51: 92-5.
21. Beatty NC, Nicholson WT, Langman LJ, et al. Pharmacogenetic workup of perioperative serotonin syndrome. *J Clin Anesth.* 2013; 25: 662-5.
22. Bergeron L, Boule M and Perreault S. Serotonin toxicity associated with concomitant use of linezolid. *Ann Pharmacother.* 2005; 39: 956-61.
23. Bertoli RB, Tosi M, Vanini G, et al. Serotonin syndrome induced by mirtazapine monotherapy. *Drug Saf.* 2004; 27: 920-.
24. Bertolin-Guillen JM, Climent-Diaz B and Navarre-Gimeno A. Serotonin syndrome due to association of venlafaxine, maprotiline and reboxetine. *Eur Psychiatry.* 2004; 19: 456-7.
25. Bhatia MS, Kaur J and Gautam P. A Case of Serotonin Syndrome Following Cyproheptadine Withdrawal. *Prim Care Companion CNS Disord.* 2015; 17.
26. Bogdanovic Z, Nalamati JR, Kilcullen JK, et al. Antidepressant-induced adverse reactions in a patient with hemorrhagic stroke. *Ann Pharmacother.* 2005; 39: 1755-7.
27. Bordelon S, Brett Lloyd R and Rosenthal LJ. Serotonin syndrome and stiff-person syndrome: diagnostic challenges in psychosomatic medicine. *Psychosomatics.* 2014; 55: 506-11.
28. Bosak A, LoVecchio F and Levine M. Recurrent seizures and serotonin syndrome following "2C-I" ingestion. *J Med Toxicol.* 2013; 9: 196-8.
29. Bosak AR and Skolnik AB. Serotonin syndrome associated with metaxalone overdose. *J Med Toxicol.* 2014; 10: 402-5.
30. Bostankolu G, Ayhan Y, Cuhadaroglu F, et al. Serotonin syndrome with a combination of aripiprazole and fluoxetine: a case report. *Ther Adv Psychopharmacol.* 2015; 5: 138-40.

31. Botros M, Wood K, Negatu Y, et al. Serotonin Syndrome and Critical Care: A Case Report. *Chest*. 2016; 150: 384A-A.
32. Boulanger-Gobeil C, St-Onge M, Laliberte M, et al. Seizures and hyponatremia related to ethcathinone and methylone poisoning. *J Med Toxicol*. 2012; 8: 59-61.
33. Bramness JG, Morland J, Sorlid HK, et al. Carisoprodol intoxications and serotonergic features. *Clin Toxicol (Phila)*. 2005; 43: 39-45.
34. Brown TM. Nitroglycerin in the treatment of the serotonin syndrome. *Am J Emerg Med*. 2004; 22: 510.
35. Brvar M, Stajer D, Kozelj G, et al. Urinary serotonin level is associated with serotonin syndrome after moclobemide, sertraline, and citalopram overdose. *Clin Toxicol*. 2007; 45: 458-60.
36. Bryant SM and Kolodchak J. Serotonin syndrome resulting from an herbal detox cocktail. *Am J Emerg Med*. 2004; 22: 625-6.
37. Bush E, Miller C and Friedman I. A case of serotonin syndrome and mutism associated with methadone. *J Palliat Med*. 2006; 9: 1257-9.
38. Butler MC, Di Battista M and Warden M. Sertraline-induced serotonin syndrome followed by mirtazapine reaction. *Prog Neuropsychopharmacol Biol Psychiatry*. 2010; 34: 1128-9.
39. Canan F, Korkmaz U, Kocer E, et al. Serotonin syndrome with paroxetine overdose: a case report. *Prim Care Companion J Clin Psychiatry*. 2008; 10: 165-7.
40. Cassens S, Nickel EA, Quintel M, et al. The serotonin syndrome. Fatal course of intoxication with citalopram and moclobemide. *Anaesthesist*. 2006; 55: 1189-+.
41. Cekmen N, Badalov P and Erdemli O. [Serotonin syndrome and cardiac arrest caused by high-dose moclobemide (case report)]. *Anesteziol Reanimatol*. 2008: 64-5.
42. Chander WP, Singh N and Mukhiya GK. Serotonin syndrome in maintenance haemodialysis patients following sertraline treatment for depression. *J Indian Med Assoc*. 2011; 109: 36-7.
43. Chen H-Y, Wu M-H, Lynn J-J, et al. Delayed presentation of serotonin syndrome after co-ingestion of serotonergic agents and benzodiazepines. *Clin Toxicol*. 2013; 51: 319-20.
44. Cheng P-L, Hung S-W, Lin L-W, et al. Amantadine-induced serotonin syndrome in a patient with renal failure. *The American journal of emergency medicine*. 2008; 26: 112.e5-6.
45. Cheng YC, Liang CM and Liu HC. Serotonin syndrome after electroconvulsive therapy in a patient on trazodone, bupropion, and quetiapine: a case report. *Clin Neuropharmacol*. 2015; 38: 112-3.

46. Chirwa I, Savage M, Sarwar A, et al. Serotonin syndrome secondary to fluoxetine precipitated by radiation induced cerebral vasculopathy. *Clin Med*. 2008; 8: 107-8.
47. Choong K and Ghiculescu RA. Iatrogenic neuropsychiatric syndromes. *Aust Fam Physician*. 2008; 37: 627-9.
48. Chopra P, Ng C and Schweitzer I. Serotonin syndrome associated with fluoxetine and olanzapine. *World J Biol Psychiatry*. 2004; 5: 114-5.
49. Choudhury M, Hote MP and Verma Y. Serotonin syndrome in a postoperative patient. *J Anaesthesiol Clin Pharmacol*. 2011; 27: 233-5.
50. Choudhury M, Hote MP and Verma Y. Serotonin syndrome in a postoperative cardiac surgical patient--a case report. *Middle East J Anesthesiol*. 2011; 21: 111-4.
51. Clark DB, Andrus MR and Byrd DC. Drug interactions between linezolid and selective serotonin reuptake inhibitors: Case report involving sertraline and review of the literature. *Pharmacotherapy*. 2006; 26: 269-76.
52. Coster S, Visser MH, Touw DJ, et al. Serotonin syndrome with sertraline and indomethacin. *J Clin Psychopharmacol*. 2010; 30: 468-70.
53. Dagtekin O, Marcus H, Muller C, et al. Lipid therapy for serotonin syndrome after intoxication with venlafaxine, lamotrigine and diazepam. *Minerva Anesthesiol*. 2011; 77: 93-5.
54. Dardis C, Omoregie E and Ly V. Fatal serotonin syndrome precipitated by oxcarbazepine in a patient using an selective serotonin reuptake inhibitor. *Neurologist*. 2012; 18: 204-5.
55. Das PK, Warkentin DI, Hewko R, et al. Serotonin syndrome after concomitant treatment with linezolid and meperidine. *Clin Infect Dis*. 2008; 46: 264-5.
56. Davies O, Batajoo-Shrestha B, Sosa-Popoteur J, et al. Full recovery after severe serotonin syndrome, severe rhabdomyolysis, multi-organ failure and disseminated intravascular coagulopathy from MDMA. *Heart Lung*. 2014; 43: 117-9.
57. Davis JJ, Buck NS, Swenson JD, et al. Serotonin syndrome manifesting as patient movement during total intravenous anesthesia with propofol and remifentanyl. *J Clin Anesth*. 2013; 25: 52-4.
58. Day LT and Jeanmonod RK. Serotonin syndrome in a patient taking Lexapro and Flexeril: a case report. *Am J Emerg Med*. 2008; 26: 1069 e1-3.
59. DeBellis RJ, Schaefer OP, Liquori M, et al. Linezolid-associated serotonin syndrome after concomitant treatment with citalopram and mirtazepine in a critically ill bone marrow transplant recipient. *J Intensive Care Med*. 2005; 20: 351-3.
60. Decoutere L, De Winter S, Vander Weyden L, et al. A venlafaxine and mirtazapine-induced serotonin syndrome confirmed by de- and re-challenge. *Int J Clin Pharm*. 2012; 34: 686-8.

61. Dolz Aspas R, Juyol Rodrigo MC and Gracia Sanchez P. [Drugs and serotonin syndrome]. *An Med Interna*. 2008; 25: 373-4.
62. Duval F, Flabeau O, Razafimahefa J, et al. Encephalopathy associated with rasagiline and sertraline in Parkinson's disease: possible serotonin syndrome. *Mov Disord*. 2013; 28: 1464.
63. Dvir Y and Smallwood P. Serotonin syndrome: a complex but easily avoidable condition. *Gen Hosp Psychiatry*. 2008; 30: 284-7.
64. El-Okdi NS, Lumbrezer D, Karanovic D, et al. Serotonin syndrome after the use of tramadol and ziprasidone in a patient with a deep brain stimulator for Parkinson disease. *Am J Ther*. 2014; 21: e97-9.
65. Elizondo Armendariz JJ, Pellejero Hernando E, Noceda Urarte MM, et al. [Probable serotonin syndrome due to linezolid and meperidine interaction]. *Farm Hosp*. 2012; 36: 448-9.
66. Esquivel Lopez A. Serotonin syndrome induced by rasagiline. *Mov Disord*. 2013; 28: S219-S.
67. Evans CE and Sebastian J. Serotonin syndrome. *Emerg Med J*. 2007; 24: e20.
68. Evans RW. The FDA alert on serotonin syndrome with combined use of SSRIs or SNRIs and Triptans: an analysis of the 29 case reports. *MedGenMed*. 2007; 9: 48.
69. Falls BA and Gurrera RJ. Serotonin syndrome in a patient on tramadol, bupropion, trazodone, and oxycodone. *Psychosomatics*. 2014; 55: 305-9.
70. Fernandes C, Reddy P and Kessel B. Rasagiline-induced serotonin syndrome. *Mov Disord*. 2011; 26: 766-7.
71. Ferra AC, Bosch PV and Raurich JM. Serotonin syndrome due to interaction between linezolid, tryptophan, and metoclopramide. *Med Intensiva*. 2009; 33: 360-1.
72. Feychting K, Jonsson B and Sjoberg G. Successful Treatment of Serotonin Syndrome with Sublingual Olanzapine. *Clin Toxicol*. 2012; 50: 323-.
73. Fil L, Sud P and Falkoff M. Herbal remedy or herbal problem? *Clin Toxicol*. 2014; 52: 740-.
74. Francescangeli J, Vaida S and Bonavia AS. Perioperative Diagnosis and Treatment of Serotonin Syndrome Following Administration of Methylene Blue. *Am J Case Rep*. 2016; 17: 347-51.
75. Frank C. Recognition and treatment of serotonin syndrome. *Can Fam Physician*. 2008; 54: 988-92.
76. Freeman WD and Chabolla DR. 36-Year-old woman with loss of consciousness, fever, and tachycardia. *Mayo Clin Proc*. 2005; 80: 667-70.

77. Freijo Guerrero J, Tardon Ruiz de Gauna L, Gomez JJ, et al. Serotonin syndrome after administration of mirtazapine in a critical care unit. *Revista espanola de anestesiologia y reanimacion*. 2009; 56: 515-6.
78. Fugate JE, White RD and Rabinstein AA. Serotonin syndrome after therapeutic hypothermia for cardiac arrest: a case series. *Resuscitation*. 2014; 85: 774-7.
79. Ganetsky M, Babu KM and Boyer EW. Serotonin syndrome in dextromethorphan ingestion responsive to propofol therapy. *Pediatr Emerg Care*. 2007; 23: 829-31.
80. Ganetsky M, Bird SB and Liang IE. Acute myocardial infarction associated with the serotonin syndrome. *Ann Intern Med*. 2006; 144: 782-3.
81. Garrett G and Sweeney M. The serotonin syndrome as a result of mephedrone toxicity. *BMJ Case Rep*. 2010; 2010.
82. Garrett PM. Tramadol overdose and serotonin syndrome manifesting as acute right heart dysfunction. *Anaesth Intensive Care*. 2004; 32: 575-7.
83. Gelener P, Gorgulu U, Kutlu G, et al. Serotonin syndrome due to duloxetine. *Clin Neuropharmacol*. 2011; 34: 127-8.
84. Gnanadesigan N, Espinoza RT, Smith R, et al. Interaction of serotonergic antidepressants and opioid analgesics: Is serotonin syndrome going undetected? *J Am Med Dir Assoc*. 2005; 6: 265-9.
85. Go AC, Golightly LK, Barber GR, et al. Linezolid interaction with serotonin reuptake inhibitors: report of two cases and incidence assessment. *Drug Metabol Drug Interact*. 2010; 25: 41-7.
86. Gollapudy S, Cronin DC, Pagel PS, et al. Serotonin Syndrome Resulting From Acute Decompensation of Nonalcoholic Steatohepatitis Cirrhosis in a Patient Chronically Treated With Citalopram and Tramadol. *J Cardiothorac Vasc Anesth*. 2017; 31: 1385-8.
87. Gollapudy S, Kumar V and Dhamee MS. A case of serotonin syndrome precipitated by fentanyl and ondansetron in a patient receiving paroxetine, duloxetine, and bupropion. *J Clin Anesth*. 2012; 24: 251-2.
88. Gressier F, Ellul P, Dutech C, et al. Serotonin toxicity in a CYP2D6 poor metabolizer, initially diagnosed as a drug-resistant major depression. *Am J Psychiatry*. 2014; 171: 890.
89. Grubb KJ, Kennedy JL, Bergin JD, et al. The role of methylene blue in serotonin syndrome following cardiac transplantation: a case report and review of the literature. *J Thorac Cardiovasc Surg*. 2012; 144: e113-6.
90. Guo SL, Wu TJ, Liu CC, et al. Meperidine-induced serotonin syndrome in a susceptible patient. *Br J Anaesth*. 2009; 103: 369-70.
91. Gupta V, Karnik ND, Deshpande R, et al. Linezolid-induced serotonin syndrome. *BMJ Case Rep*. 2013; 2013.

92. Hachem RY, Hicks K, Huen A, et al. Myelosuppression and serotonin syndrome associated with concurrent use of linezolid and selective serotonin reuptake inhibitors in bone marrow transplant recipients. *Clin Infect Dis*. 2003; 37: e8-11.
93. Hackelsberger N, Ried M and Reiners A. Drug Interaction - a Pitfall in Rehabilitation. *Physikalische Medizin Rehabilitationsmedizin Kurortmedizin*. 2008; 18: 355-7.
94. Hadikusumo B and Ng B. Serotonin syndrome induced by duloxetine. *Aust N Z J Psychiatry*. 2009; 43: 581-2.
95. Hagerich KL and McNeil MA. Serotonin syndrome: too much of a good thing. *J Gen Intern Med*. 2009; 24: 352-.
96. Haggerty DA and Curtis J. Serotonin Syndrome Induced Solely by Carisoprodol Overdose. *Clin Toxicol*. 2010; 48: 257-.
97. Hanekamp BB, Zijlstra JG, Tulleken JE, et al. Serotonin syndrome and rhabdomyolysis in venlafaxine poisoning: a case report. *Neth J Med*. 2005; 63: 316-8.
98. Hanna ER and Clark JA. Serotonin syndrome after cardiopulmonary bypass: a case demonstrating the interaction between methylene blue and selective serotonin reuptake inhibitors. *A A Case Rep*. 2014; 2: 113-4.
99. Hayllar J and Finn J. Serotonin toxicity? The relevance of buprenorphine/naloxone in a curious case of confusion and clonus. *Drug and Alcohol Review*. 2012; 31: 71-.
100. Hébant B, Guillaume M, Desbordes M, et al. Combination of paroxetine and rasagiline induces serotonin syndrome in a parkinsonian patient. *Rev Neurol (Paris)*. 2016; 172: 788-9.
101. Hencken L, To L, Ly N, et al. Serotonin Syndrome Following Methylene Blue Administration for Vasoplegic Syndrome. *J Card Surg*. 2016; 31: 208-10.
102. Hendrix Y and van Zagten MSG. Serotonin syndrome as a result of concomitant use of paroxetine and sumatriptan. *Ned Tijdschr Geneesk*. 2005; 149: 888-90.
103. Heritier Barras AC, Walder B and Seeck M. Serotonin syndrome following Methylene Blue infusion: a rare complication of antidepressant therapy. *J Neurol Neurosurg Psychiatry*. 2010; 81: 1412-3.
104. Hernandez-Lorente E, Broto PL, Brumos LG, et al. [Serotonin syndrome associated with linezolid]. *Med Clin (Barc)*. 2009; 132: 157-8.
105. Himmighoffen H, Seifritz E and Boeker H. Serotonin Syndrome after Discontinuation of Olanzapine in a Combined Treatment with Duloxetine - Case Report. *Pharmacopsychiatry*. 2011; 44: 75-7.
106. Hisham M, Sivakumar MN, Nandakumar V, et al. Linezolid and Rasagiline - A culprit for serotonin syndrome. *Indian J Pharmacol*. 2016; 48: 91-2.
107. Ho-Kyung S. Serotonin Syndrome with Perioperative Oxycodone and Pregabalin. *Pain Physician*. 2013; 16: E632-E3.

108. Houlihan DJ. Serotonin syndrome resulting from coadministration of tramadol, venlafaxine, and mirtazapine. *Ann Pharmacother.* 2004; 38: 411-3.
109. Hruby R. Serotonin syndrome - A case report. *Int J Neuropsychopharmacol.* 2006; 9: S217-S8.
110. Hunter B, Kleinert MM, Osatnik J, et al. Serotonergic syndrome and abnormal ocular movements: worsening of rigidity by remifentanyl? *Anesth Analg.* 2006; 102: 1589.
111. Huska MT, Catalano G and Catalano MC. Serotonin syndrome associated with the use of escitalopram. *CNS Spectr.* 2007; 12: 270-4.
112. Ignneri L, Shaw C and Solomon B. Life-threatening serotonin syndrome after administration of metaxalone in a patient on citalopram. *Crit Care Med.* 2013; 41.
113. Inoue T, Watanabe Y, Nodaira Y, et al. [Peritoneal dialysis patient affected with serotonin syndrome]. *Nihon Naika Gakkai Zasshi.* 2008; 97: 3049-51.
114. Iqbal F and Tsevat J. Serotonin syndrome resulting from concomitant therapy with sertraline and linezolid. *J Gen Intern Med.* 2009; 24: 351-2.
115. Isenberg D, Wong SC and Curtis JA. Serotonin syndrome triggered by a single dose of suboxone. *Am J Emerg Med.* 2008; 26: 840 e3-5.
116. Ishii M, Tatsuzawa Y, Yoshino A, et al. Serotonin syndrome induced by augmentation of SSRI with methylphenidate. *Psychiatry Clin Neurosci.* 2008; 62: 246-.
117. Izdes S, Altintas ND and Soykut C. Serotonin syndrome caused by administration of methylene blue to a patient receiving selective serotonin reuptake inhibitors. *A A Case Rep.* 2014; 2: 111-2.
118. Jagestedt M and von Bahr C. [Combination of serotonergic agents resulted in severe adverse effects]. *Lakartidningen.* 2004; 101: 1618-9.
119. Jang SH, Kwon YM and Chang MC. Serotonin Syndrome in Stroke Patients. *J Rehabil Med.* 2015; 47: 282-5 [identified 2014 via e-pub ahead of print ].
120. Jang SH, Kwon YM and Chang MC. Serotonin syndrome in stroke patients. *J Rehabil Med.* 2015; 47: 282-5.
121. Jimenez-Genchi A. Immediate switching from moclobemide to duloxetine may induce serotonin syndrome. *J Clin Psychiatry.* 2006; 67: 1821-2.
122. John AP and Koloth R. Severe serotonin toxicity and manic switch induced by combined use of tramadol and paroxetine. *Aust N Z J Psychiatry.* 2007; 41: 192-3.
123. John S, Donnelly M and Uchino K. Catastrophic reversible cerebral vasoconstriction syndrome associated with serotonin syndrome. *Headache.* 2013; 53: 1482-7.
124. Joksovic P, Mellos N, van Wattum PJ, et al. "Bath Salts"-Induced Psychosis and Serotonin Toxicity. *J Clin Psychiatry.* 2012; 73: 1125-.



125. Kaci J, Lowenthal DT and Lagasse S. Clinical physiology and pharmacology conference: rhabdomyolysis and serotonin syndrome in an elderly patient. *Int Urol Nephrol.* 2007; 39: 985-7.
126. Kan R, Endou M and Unno Y. [A case of serotonin syndrome following minimum doses of sertraline]. *Seishin Shinkeigaku Zasshi.* 2009; 111: 1041-6.
127. Kapadia K, Cheung F, Lee W, et al. Methylene Blue Causing Serotonin Syndrome Following Cystocele Repair. *Urol Case Rep.* 2016; 9: 15-7.
128. Karunatilake H and Buckley NA. Serotonin syndrome induced by fluvoxamine and oxycodone. *Ann Pharmacother.* 2006; 40: 155-7.
129. Keegan MT, Brown DR and Rabinstein AA. Serotonin syndrome from the interaction of cyclobenzaprine with other serotonergic drugs. *Anesth Analg.* 2006; 103: 1466-8.
130. Khavandi A, Whitaker J and Gonna H. Serotonin toxicity precipitated by concomitant use of citalopram and methylene blue. *Med J Aust.* 2008; 189: 534-5.
131. Kinoshita H, Ohkubo T, Yasuda M, et al. Serotonin syndrome induced by dextromethorphan (Medicon) administered at the conventional dose. *Geriatr Gerontol Int.* 2011; 11: 121-2.
132. Kinzie E and Meltzer-Brody S. Possible serotonin syndrome with citalopram following cross-titration of clozapine to ziprasidone. *Gen Hosp Psychiatry.* 2005; 27: 223-4.
133. Kirschner R and Donovan JW. Serotonin syndrome precipitated by fentanyl during procedural sedation. *J Emerg Med.* 2010; 38: 477-80.
134. Kirschner RI and Donovan JW. Severe serotonin toxicity treated with intravenous propofol. *Clin Toxicol.* 2006; 44: 732-3.
135. Kitson R and Carr B. Tramadol and severe serotonin syndrome. *Anaesthesia.* 2005; 60: 934-5.
136. Klys M, Kowalski P, Rojek S, et al. Death of a female cocaine user due to the serotonin syndrome following moclobemide-venlafaxine overdose. *Forensic Sci Int.* 2009; 184: e16-20.
137. Klysner R, Bjerg Bendsen B and Hansen MS. Transient serotonin toxicity evoked by combination of electroconvulsive therapy and fluoxetine. *Case Rep Psychiatry.* 2014; 2014: 162502.
138. Kohen I, Gordon ML and Manu P. Serotonin syndrome in elderly patients treated for psychotic depression with atypical antipsychotics and antidepressants: two case reports. *CNS Spectr.* 2007; 12: 596-8.
139. Kotwal A and Cutrona SL. Serotonin Syndrome in the Setting of Lamotrigine, Aripiprazole, and Cocaine Use. *Case Rep Med.* 2015; 2015: 769531.

140. Kovacic S, Vukovic S, Kocijan-Lovko S, et al. Combination of fluvoxamine and analgesics can cause serotonin syndrome. *European Journal of Psychiatry*. 2009; 23: 47-51.
141. Kulkarni RR and Kulkarni PR. Linezolid-induced near-fatal serotonin syndrome during escitalopram therapy: case report and review of literature. *Indian J Psychol Med*. 2013; 35: 413-6.
142. Kumar BN, Shah R and Grover S. Serotonin syndrome while switching antidepressants. *Indian J Psychiatry*. 2011; 53: 372.
143. Kushwaha S, Panda AK, Malhotra HS, et al. Serotonin syndrome following levodopa treatment in diffuse Lewy body disease. *BMJ Case Rep*. 2014; 2014.
144. Lam PK, Leung KS, Wong TW, et al. Serotonin syndrome following overdose of a non-prescription slimming product containing sibutramine: a case report. *Hum Exp Toxicol*. 2012; 31: 414-7.
145. Lamberg JJ and Gordin VN. Serotonin syndrome in a patient with chronic pain polypharmacy. *Pain Med*. 2014; 15: 1429-31.
146. Lang PO, Hasso Y, Hilleret H, et al. [Serotonin syndrome as a result of escitalopram and cyclosporin combination in an 84-year-old woman]. *Rev Med Interne*. 2008; 29: 583-6.
147. Larson KJ, Wittwer ED, Nicholson WT, et al. Myoclonus in patient on fluoxetine after receiving fentanyl and low-dose methylene blue during sentinel lymph node biopsy. *J Clin Anesth*. 2015; 27: 247-51.
148. Lattanzi L, Danesi R, Lastella M, et al. Serotonin syndrome and the T102-->C polymorphism of the 5-HT<sub>2A</sub> receptor: a case report. *Bipolar Disord*. 2008; 10: 655-6.
149. Lawyer TI, Jensen J and Welton RS. Serotonin Syndrome in the Deployed Setting. *Mil Med*. 2010; 175: 950-2.
150. Lee J, Franz L and Goforth HW. Serotonin syndrome in a chronic-pain patient receiving concurrent methadone, ciprofloxacin, and venlafaxine. *Psychosomatics*. 2009; 50: 638-9.
151. Levin TT, Cortes-Ladino A, Weiss M, et al. Life-threatening serotonin toxicity due to a citalopram-fluconazole drug interaction: case reports and discussion. *Gen Hosp Psychiatry*. 2008; 30: 372-7.
152. Levine M, Truitt CA and O'Connor AD. Cardiotoxicity and serotonin syndrome complicating a milnacipran overdose. *J Med Toxicol*. 2011; 7: 312-6.
153. Liau CH, Shen WW and Su KP. Venlafaxine-associated serotonin syndrome and manic episode in a geriatric depressive patient. *Psychiatry Clin Neurosci*. 2006; 60: 121-2.

154. Liberek C, Aubry J-M and Baud P. Manic switch and serotonin syndrome with venlafaxine-lithium-valproate association. *Therapie*. 2006; 61: 531-3.
155. Lin PY, Hong CJ and Tsai SJ. Serotonin syndrome caused by ziprasidone alone. *Psychiatry Clin Neurosci*. 2010; 64: 338-9.
156. Llinares-Tello F, Escriva-Moscardo S, Martinez-Pastor F, et al. [Possible serotonergic syndrome associated with coadministration of paroxetine and tramadol]. *Med Clin (Barc)*. 2007; 128: 438.
157. Lopez AM, Kornegay J and Hendrickson RG. Serotonin toxicity associated with *Garcinia cambogia* over-the-counter supplement. *J Med Toxicol*. 2014; 10: 399-401.
158. Lorenz RA, Vandenberg AM and Canepa EA. Serotonergic antidepressants and linezolid: A retrospective chart review and presentation of cases. *Int J Psychiatry Med*. 2008; 38: 81-90.
159. Lorenzini KI, Calmy A, Ambrosioni J, et al. Serotonin syndrome following drug-drug interactions and CYP2D6 and CYP2C19 genetic polymorphisms in an HIV-infected patient. *AIDS*. 2012; 26: 2417-8.
160. Ma J, Zhu P, Tu G, et al. Serotonin syndrome under combination of linezolid and low-dose citalopram with amiodarone. *Psychiatry Clin Neurosci*. 2013; 67: 457.
161. Madsen JM and Curtis JA. An Unusual Case of Serotonin Toxicity. *Clin Toxicol*. 2010; 48: 254-.
162. Mahlberg R, Kunz D, Sasse J, et al. Serotonin syndrome with tramadol and citalopram. *Am J Psychiatry*. 2004; 161: 1129.
163. Majewska M, Szponar J, Pyra E, et al. Serotonin syndrome in the course of drug-poisoning--case presentation. *Przegl Lek*. 2011; 68: 523-6.
164. Malik A and Junglee N. A case of the serotonin syndrome secondary to phenelzine monotherapy at therapeutic dosing. *Case Rep Med*. 2015; 2015: 931963.
165. Malik HU-R and Kumar K. Serotonin syndrome with escitalopram and concomitant use of cocaine: a case report. *Clinical medicine insights Case reports*. 2012; 5: 81-5.
166. Mancano MA. Trimethoprim-Sulfamethoxazole-Induced Rhabdomyolysis; Gabapentin-Induced Hypoglycemia in Diabetic and Nondiabetic Patients; Purple Glove Syndrome After Oral Phenytoin Administration; Acute Dystonic Reaction After Methylphenidate Initiation; Serotonin Syndrome with Vilazodone Monotherapy; Cabozantinib-Associated Dermatologic Adverse Reactions. *Hosp Pharm*. 2015; 50: 662-6.
167. Marlowe K and Schirgel D. Quetiapine and citalopram: aetiological significances in serotonin syndrome. *N Z Med J*. 2006; 119: U2058.
168. Martini DI, Nacca N, Haswell D, et al. Serotonin syndrome following metaxalone overdose and therapeutic use of a selective serotonin reuptake inhibitor. *Clin Toxicol (Phila)*. 2015; 53: 185-7.

169. Mateo-Carrasco H, Munoz-Aguilera EM, Garcia-Torrecillas JM, et al. Serotonin syndrome probably triggered by a morphine-phenelzine interaction. *Pharmacotherapy*. 2015; 35: e102-5.
170. Mathew S, Linhartova L and Raghuraman G. Hyperpyrexia and prolonged postoperative disorientation following methylene blue infusion during parathyroidectomy. *Anaesthesia*. 2006; 61: 580-3.
171. McClean M, Walsh JC and Condon F. Serotonin syndrome in an orthopaedic patient secondary to linezolid therapy for MRSA infection. *Ir J Med Sci*. 2011; 180: 285-6.
172. McDonnell AM, Rybak I, Wadleigh M, et al. Suspected serotonin syndrome in a patient being treated with methylene blue for ifosfamide encephalopathy. *Journal of oncology pharmacy practice : official publication of the International Society of Oncology Pharmacy Practitioners*. 2012; 18: 436-9.
173. Miller DK, Bowirrat A, Manka M, et al. Acute intravenous synaptamine complex variant KB220 "normalizes" neurological dysregulation in patients during protracted abstinence from alcohol and opiates as observed using quantitative electroencephalographic and genetic analysis for reward polymorphisms: part 1, pilot study with 2 case reports. *Postgrad Med*. 2010; 122: 188-213.
174. Misselbrook GP and Shekhar R. Serotonin syndrome: an unusual cause of acute confusion and fever in the elderly. *Acute Med*. 2011; 10: 206-8.
175. Montane E, Barriocanal A, Isern I, et al. Multiple drug interactions - induced serotonin syndrome: a case report. *J Clin Pharm Ther*. 2009; 34: 485-7.
176. Montanes-Rada F, Bilbao-Garay J, de Lucas-Taracena MT, et al. Venlafaxine, serotonin syndrome, and differential diagnoses. *J Clin Psychopharmacol*. 2005; 25: 101-2.
177. Monte AA, Chuang R and Bodmer M. Dextromethorphan, chlorphenamine and serotonin toxicity: case report and systematic literature review. *Br J Clin Pharmacol*. 2010; 70: 794-8.
178. Monte AA and Waksman JC. Chronic olanzapine, serotonin receptors, and subsequent serotonin toxicity. *J Clin Psychopharmacol*. 2010; 30: 628-9.
179. Monterrubio Villar J and Cordoba Lopez A. [Serotonergic syndrome after the administration of clomipramine tablet in a critical patient]. *Med Intensiva*. 2007; 31: 343-4.
180. Morales N and Vermette H. Serotonin syndrome associated with linezolid treatment after discontinuation of fluoxetine. *Psychosomatics*. 2005; 46: 274-5.
181. Moseson E and Nichols D. The Clinical Roller Coaster: Severe Serotonin Syndrome. *Crit Care Med*. 2013; 41.
182. Mugele J, Nanagas KA and Tormoehlen LM. Serotonin syndrome associated with MDPV use: a case report. *Ann Emerg Med*. 2012; 60: 100-2.

183. Munhoz RP. Serotonin syndrome induced by a combination of bupropion and SSRIs. *Clin Neuropharmacol.* 2004; 27: 219-22.
184. Muzyk AJ, Jakel RJ and Preud'homme X. Serotonin syndrome after a massive overdose of controlled-release paroxetine. *Psychosomatics.* 2010; 51: 437-42.
185. Nadkarni GN, Hoskote SS, Piotrkowski J, et al. Serotonin Syndrome, Disseminated Intravascular Coagulation, and Hepatitis After a Single Ingestion of MDMA in an Asian Woman. *Am J Ther.* 2012.
186. Naka T, Jones D, Baldwin I, et al. Myoglobin clearance by super high-flux hemofiltration in a case of severe rhabdomyolysis: a case report. *Crit Care.* 2005; 9: R90-5.
187. Nakayama H, Umeda S, Nibuya M, et al. Two cases of mild serotonin toxicity via 5-hydroxytryptamine 1A receptor stimulation. *Neuropsychiatr Dis Treat.* 2014; 10: 283-7.
188. Navarro A, Perry C and Bobo WV. A case of serotonin syndrome precipitated by abuse of the anticough remedy dextromethorphan in a bipolar patient treated with fluoxetine and lithium. *Gen Hosp Psychiatry.* 2006; 28: 78-80.
189. Nayyar N. Serotonin syndrome associated with sertraline, trazodone and tramadol abuse. *Indian J Psychiatry.* 2009; 51: 68.
190. Necpal J and Skorvanek M. Opsoclonus-myoclonus ataxia syndrome secondary to venlafaxine intoxication. *J Neurol Sci.* 2017; 372: 19-20.
191. Nefcy A, Wilson J, Smith MP, et al. Which reality is this? A novel PCP analog combined with 2C-NBOMe causes a dissociative serotonin syndrome. *Clin Toxicol.* 2013; 51: 665-.
192. Newey CR, Khawam E and Coffman K. Two Cases of Serotonin Syndrome with Venlafaxine and Calcineurin Inhibitors. *Psychosomatics.* 2011; 52: 286-90.
193. Ng BK, Cameron AJ, Liang R, et al. [Serotonin syndrome following methylene blue infusion during parathyroidectomy: a case report and literature review]. *Can J Anaesth.* 2008; 55: 36-41.
194. Nicolaou G and Lee D. Methylene blue-induced serotonin syndrome presenting with ocular clonus and failure of emergence from general anesthesia. *Can J Anaesth.* 2016; 63: 896-7.
195. Nordstrom K, Vilke GM and Wilson MP. Psychiatric Emergencies for Clinicians: Emergency Department Management of Serotonin Syndrome. *J Emerg Med.* 2016; 50: 89-91.
196. Okamoto N, Sakamoto K, Nagafusa Y, et al. Electroconvulsive therapy as a potentially effective treatment for severe serotonin syndrome: two case reports. *J Clin Psychopharmacol.* 2010; 30: 350-2.

197. Okamoto N, Sakamoto K and Yamada M. Transient serotonin syndrome by concurrent use of electroconvulsive therapy and selective serotonin reuptake inhibitor: a case report and review of the literature. *Case Rep Psychiatry*. 2012; 2012: 215214.
198. Ozdemir S, Yalug I and Aker AT. Serotonin syndrome associated with sertraline monotherapy at therapeutic doses. *Prog Neuropsychopharmacol Biol Psychiatry*. 2008; 32: 897-8.
199. Ozkardesler S, Gurpinar T, Akan M, et al. A possible perianesthetic serotonin syndrome related to intrathecal fentanyl. *J Clin Anesth*. 2008; 20: 143-5.
200. Palekar N and Eisman J. Serotonin Syndrome With Ziprasidone and Sertraline. *J Neuropsychiatry Clin Neurosci*. 2013; 25: E1-E.
201. Park YM and Jung YK. Manic switch and serotonin syndrome induced by augmentation of paroxetine with methylphenidate in a patient with major depression. *Prog Neuropsychopharmacol Biol Psychiatry*. 2010; 34: 719-20.
202. Paruchuri P, Godkar D, Anandacoomarswamy D, et al. Rare case of serotonin syndrome with therapeutic doses of paroxetine. *Am J Ther*. 2006; 13: 550-2.
203. Passmore MJ, Devarajan S, Ghatavi K, et al. Serotonin syndrome with prolonged dysphagia. *Can J Psychiatry*. 2004; 49: 79-80.
204. Peacock LE and Wright F. Serotonin syndrome secondary to tramadol and citalopram. *Age Ageing*. 2011; 40: 528.
205. Pearce S, Ahned N and Varas GM. A case study of delayed serotonin syndrome: lessons learned. *Consult Pharm*. 2009; 24: 64-8.
206. Pettit NN, Alonso V, Wojcik E, et al. Possible serotonin syndrome with carbidopa-levodopa and linezolid. *J Clin Pharm Ther*. 2016; 41: 101-3.
207. Pilgrim JL, Gerostamoulos D, Woodford N, et al. Serotonin toxicity involving MDMA (ecstasy) and moclobemide. *Forensic Sci Int*. 2012; 215: 184-8.
208. Pinel-Rios FJ, Penuelas-Calvo I, Cerezo-Ramirez N, et al. Serotonin syndrome induced by a combination of venlafaxine and clomipramine. A case report. *Actas Esp Psiquiatr*. 2016; 44: 193-202.
209. Poeschla BD, Bartle P and Hansen KP. Serotonin syndrome associated with polypharmacy in the elderly. *Gen Hosp Psychiatry*. 2011; 33: 301 e9-11.
210. Pollack G, Pollack A, Delfiner J, et al. Parathyroid surgery and methylene blue: a review with guidelines for safe intraoperative use. *Laryngoscope*. 2009; 119: 1941-6.
211. Prakash S, Belani P and Trivedi A. Headache as a presenting feature in patients with serotonin syndrome: a case series. *Cephalalgia*. 2014; 34: 148-53.

212. Prakash S, Gosai F, Brahmabhatt J, et al. Serotonin syndrome in patients with peripheral neuropathy: a diagnostic challenge. *Gen Hosp Psychiatry*. 2014; 36: 450 e9-11.
213. Prakash S, Makwana P, Rathore C, et al. Serotonin syndrome presenting as febrile encephalopathy with CSF pleocytosis: a report of three cases. *Neurol Sci*. 2016; 37: 1561-4.
214. Prakash S, Patel V, Kakked S, et al. Mild serotonin syndrome: A report of 12 cases. *Ann Indian Acad Neurol*. 2015; 18: 226-30.
215. Prakash S and Rathore C. Cyproheptadine-dependent chronic serotonin syndrome. *Neurol India*. 2016; 64: 1319-21.
216. Prakash S and Rathore C. Serotonin syndrome presenting as surgical emergency: A report of two cases. *Indian J Crit Care Med*. 2016; 20: 120-2.
217. Prator BC. Serotonin syndrome. *J Neurosci Nurs*. 2006; 38: 102-5.
218. Primeau M, Pomeraniec F and Wallace DM. Serotonin Toxicity in Aripiprazole Augmentation. *J Neuropsychiatry Clin Neurosci*. 2012; 24: E36-E7.
219. Proudfoot M and Gormley J. Serotonin syndrome: pills, thrills and shoulder aches. *BMJ Case Rep*. 2013; 2013.
220. Rahim MT and Jasti H. Shivers and tremors: A case of serotonin syndrome. *J Gen Intern Med*. 2006; 21: 267-8.
221. Rajapakse S, Abeynaike L and Wickramaratne T. Venlafaxine-associated serotonin syndrome causing severe rhabdomyolysis and acute renal failure in a patient with idiopathic Parkinson disease. *J Clin Psychopharmacol*. 2010; 30: 620-2.
222. Rang ST, Field J and Irving C. Serotonin toxicity caused by an interaction between fentanyl and paroxetine. *Can J Anaesth*. 2008; 55: 521-5.
223. Rastogi R, Swarm RA and Patel TA. Case scenario: opioid association with serotonin syndrome: implications to the practitioners. *Anesthesiology*. 2011; 115: 1291-8.
224. Rehman HU and Prasad B. Recent onset of confusion, limited mobility, and disturbed sleep-wake cycle. *J Fam Pract*. 2011; 60: 261-4.
225. Rehman T. Posterior reversible encephalopathy syndrome. *Am J Med Sci*. 2015; 349: 244.
226. Reich M and Lefebvre-Kuntz D. Serotonergic antidepressants and opiate analgesics: A sometimes-painful association. A case report. *Encephale-Revue De Psychiatrie Clinique Biologique Et Therapeutique*. 2010; 36: D119-D23.
227. Riley B. Serotonin syndrome in a patient treated with linezolid. *Clin Toxicol*. 2005; 43: 632-3.
228. Rim CL and Gitlin MJ. Ziprasidone, monoamine oxidase inhibitors, and the serotonin syndrome. *J Clin Psychopharmacol*. 2010; 30: 470-1.

229. Rittmannsberger H and Werl R. Does aripiprazole protect from serotonin syndrome? *Psychiatr Danub*. 2012; 24: 100-1.
230. Roth CK, Hering SL and Campos S. Serotonin Syndrome in Pregnancy. *Nurs Womens Health*. 2015; 19: 345-9.
231. Rowley M, Riutort K, Shapiro D, et al. Methylene blue-associated serotonin syndrome: a 'green' encephalopathy after parathyroidectomy. *Neurocrit Care*. 2009; 11: 88-93.
232. Roy B and Massie FS. The Tipping Point: Methadone as a Trigger for serotonin Syndrome. *J Gen Intern Med*. 2011; 26: S455-S6.
233. Sahiner V and Erden Aki SO. [Serotonin syndrome associated with linezolid use: a case report]. *Turk Psikiyatri Derg*. 2009; 20: 398-402.
234. Samartzis L, Savvari P, Kontogiannis S, et al. Linezolid is associated with serotonin syndrome in a patient receiving amitriptyline, and fentanyl: a case report and review of the literature. *Case reports in psychiatry*. 2013; 2013: 617251-.
235. Sanyal D, Chakraborty S and Bhattacharyya R. An interesting case of serotonin syndrome precipitated by escitalopram. *Indian J Pharmacol*. 2010; 42: 418-9.
236. Sartorius A, Wolf J and Henn FA. Lithium and ECT--concurrent use still demands attention: three case reports. *World J Biol Psychiatry*. 2005; 6: 121-4.
237. Sato A, Okura Y, Minagawa S, et al. Life-threatening serotonin syndrome in a patient with chronic heart failure and CYP2D6\*1/\*5. *Mayo Clin Proc*. 2004; 79: 1444-8.
238. Sato Y, Nakamura K and Yasui-Furukori N. Serotonin syndrome induced by the readministration of escitalopram after a short-term interruption in an elderly woman with depression: a case report. *Neuropsychiatr Dis Treat*. 2015; 11: 2505-7.
239. Satoh K, Takano S, Onogi T, et al. Serotonin syndrome caused by minimum doses of SSRIS in a patient with spinal cord injury. *Fukushima J Med Sci*. 2006; 52: 29-33.
240. Schuch LG, Yip A, Nouri KF, et al. Serotonin Syndrome Following an Uncomplicated Orthopedic Surgery in a Patient With Post-Traumatic Stress Disorder. *Mil Med*. 2016; 181: e1185-8.
241. Schwartz AR, Pizon AF and Brooks DE. Dextromethorphan-induced serotonin syndrome. *Clin Toxicol*. 2008; 46: 771-3.
242. Schwiebert C, Irving C and Gillman PK. Small doses of methylene blue, previously considered safe, can precipitate serotonin toxicity. *Anaesthesia*. 2009; 64: 924.
243. Sethi R, Kablinger AS and Kavuru B. Serotonin Syndrome in a Sertraline-Treated Man Taking NyQuil Containing Dextromethorphan for Cold. *Prim Care Companion CNS Disord*. 2012; 14.
244. Shah ND and Jain AB. Serotonin syndrome presenting as pulmonary edema. *Indian J Pharmacol*. 2016; 48: 93-5.



245. Shahani L. Tramadol precipitating serotonin syndrome in a patient on antidepressants. *J Neuropsychiatry Clin Neurosci.* 2012; 24: E52.
246. Shahani L. Venlafaxine augmentation with lithium leading to serotonin syndrome. *J Neuropsychiatry Clin Neurosci.* 2012; 24: E47.
247. Shaikh ZS, Krueper S and Malins TJ. Serotonin syndrome: take a closer look at the unwell surgical patient. *Ann R Coll Surg Engl.* 2011; 93: 569-72.
248. Shakoor M, Ayub S, Ahad A, et al. Transient serotonin syndrome caused by concurrent use of tramadol and selective serotonin reuptake inhibitor. *Am J Case Rep.* 2014; 15: 562-4.
249. Shanmugam G, Kent B, Alsaiwadi T, et al. Serotonin syndrome following cardiac surgery. *Interact Cardiovasc Thorac Surg.* 2008; 7: 656-7.
250. Sharma V. Tramadol-Induced Hypomania and Serotonin Syndrome. *Prim Care Companion CNS Disord.* 2016; 18.
251. Shioda K, Nisijima K, Nishida S, et al. Possible serotonin syndrome arising from an interaction between caffeine and serotonergic antidepressants. *Hum Psychopharmacol.* 2004; 19: 353-4.
252. Shopes E, Gerard W and Baughman J. Methylene blue encephalopathy: a case report and review of published cases. *AANA J.* 2013; 81: 215-21.
253. Simpson SE and Greenberg MI. Serotonin syndrome associated with ramelteon overdose. *Clin Toxicol.* 2007; 45: 630-1.
254. Slettedal JK, Nilssen DO, Magelssen M, et al. Brain pathology in fatal serotonin syndrome: presentation of two cases. *Neuropathology.* 2011; 31: 265-70.
255. Smith C, Marshall SW, Crouch B, et al. Serotonin Syndrome Precipitated by Methylene Blue. *Clin Toxicol.* 2010; 48: 664-.
256. Smith CJ, Wang D, Sgambelluri A, et al. Serotonin syndrome following methylene blue administration during cardiothoracic surgery. *J Pharm Pract.* 2015; 28: 207-11.
257. Somes J and Donatelli NS. Serotonin syndrome-muscle rigidity and confusion in the older adult. *J Emerg Nurs.* 2012; 38: 76-8.
258. Srisuma S, Hoyte CO, Wongvisavakorn S, et al. Serotonin syndrome precipitated by sertraline and discontinuation of clozapine. *Clin Toxicol (Phila).* 2015; 53: 840-1.
259. Stevenson E, Schembri F, Green DM, et al. Serotonin syndrome associated with clozapine withdrawal. *JAMA Neurol.* 2013; 70: 1054-5.
260. Stewart DE. Venlafaxine and sour date nut. *Am J Psychiatry.* 2004; 161: 1129-30.
261. Stinnett A and Neill K. Case report - serotonin syndrome resulting from exposure to venlafaxine during acute renal insufficiency. *Crit Care Med.* 2009; 37: A511-A.

262. Strand JJ and Bundrick JB. Clinical pearls in palliative medicine. *Dis Mon.* 2015; 61: 346-55.
263. Strouse TB, Kerrihard TN, Forscher CA, et al. Serotonin syndrome precipitated by linezolid in a medically ill patient on duloxetine. *J Clin Psychopharmacol.* 2006; 26: 681-3.
264. Surmaitis RM, Nappe TM and Cook MD. Serotonin syndrome associated with therapeutic metaxalone in a patient with cirrhosis. *Am J Emerg Med.* 2016; 34: 346 e5-6.
265. Sutton J, Stroup J and Som M. Linezolid-induced serotonin toxicity in a patient not taking monoamine oxidase inhibitors or serotonin receptor antagonists. *Proc (Bayl Univ Med Cent).* 2016; 29: 214-5.
266. Szakaly B and Strauss R. Serotonin syndrome in the oral and maxillofacial surgery office: a review of the literature and report of a case. *J Oral Maxillofac Surg.* 2008; 66: 1949-52.
267. Szolics M, Chaudhry M, Ljubisavljevic M, et al. Neuroimaging findings in a case of fluoxetine overdose. *J Neuroradiol.* 2012; 39: 254-7.
268. Tahir N. Serotonin syndrome as a consequence of drug-resistant infections: an interaction between linezolid and citalopram. *J Am Med Dir Assoc.* 2004; 5: 111-3.
269. Takeshita J and Litzinger MH. Serotonin syndrome associated with tramadol. *Prim Care Companion J Clin Psychiatry.* 2009; 11: 273.
270. Talarico G, Tosto G, Pietracupa S, et al. Serotonin toxicity: a short review of the literature and two case reports involving citalopram. *Neurol Sci.* 2011; 32: 507-9.
271. Tanaka T, Takasu A, Yoshino A, et al. Diphenhydramine overdose mimicking serotonin syndrome. *Psychiatry Clin Neurosci.* 2011; 65: 534.
272. Taylor JJ, Wilson JW and Estes LL. Linezolid and serotonergic drug interactions: a retrospective survey. *Clin Infect Dis.* 2006; 43: 180-7.
273. Terao T and Hikichi T. Serotonin syndrome in a case of depression with various somatic symptoms: The difficulty in differential diagnosis. *Prog Neuropsychopharmacol Biol Psychiatry.* 2007; 31: 295-6.
274. Tiamfook TO, Biddinger PD, Brown DF, et al. Myoclonus and tachycardia. *J Emerg Med.* 2005; 28: 211-4.
275. Top WM, Gillman PK, de Langen CJ, et al. Fatal methylene blue associated serotonin toxicity. *Neth J Med.* 2014; 72: 179-81.
276. Torre LE, Menon R and Power BM. Prolonged serotonin toxicity with proserotonergic drugs in the intensive care unit. *Crit Care Resusc.* 2009; 11: 272-5.
277. Tseng W-P, Tsai J-H, Wu M-T, et al. Citalopram-induced serotonin syndrome: a case report. *The Kaohsiung journal of medical sciences.* 2005; 21: 326-8.

278. Turedi S, Eraydin I, Gunduz A, et al. First time, low dose citalopram use-related serotonin syndrome. *Neurotoxicology*. 2007; 28: 1272-4.
279. Vari G and Beckson M. Escitalopram-associated serotonin toxicity. *J Clin Psychopharmacol*. 2007; 27: 229-30.
280. Velez LI, Shepherd G, Roth BA, et al. Serotonin syndrome with elevated paroxetine concentrations. *Ann Pharmacother*. 2004; 38: 269-72.
281. Verre M, Bossio F, Mammone A, et al. Serotonin syndrome caused by olanzapine and clomipramine. *Minerva Anestesiol*. 2008; 74: 41-5.
282. Vinetti M, Duprez T and Philippe H. Severe postoperative hyperthermic syndrome after addition of tilidine/naloxone to duloxetine therapy. *Clin Toxicol*. 2013; 51: 516-7.
283. Walczyk H, Liu CH, Alafiris A, et al. Probable Tapentadol-Associated Serotonin Syndrome After Overdose. *Hosp Pharm*. 2016; 51: 320-7.
284. Walter C, Ball D, Duffy M, et al. An unusual case of serotonin syndrome with oxycodone and citalopram. *Case Rep Oncol Med*. 2012; 2012: 261787.
285. Warrick BJ, Wilson J, Hedge M, et al. Lethal serotonin syndrome after methylone and butylone ingestion. *J Med Toxicol*. 2012; 8: 65-8.
286. Weibrecht KW and Boyer EW. Fluoxetine and 3,4-Methylenedioxyamphetamine Induced Serotonin Syndrome Responsive to Propofol Therapy. *Clin Toxicol*. 2010; 48: 247-.
287. Whipp MJ and Waterfield KE. Serotonin syndrome in the differential diagnosis of spinal cord compression. *Palliat Med*. 2004; 18: 69-70.
288. Wiegand TJ. A cathinone of a different color - two cases of bupropion abuse presenting with seizures and serotonin syndrome. *Clin Toxicol*. 2013; 51: 349-50.
289. Wilson L, Rooney T, Baugh RF, et al. Recognition and management of perioperative serotonin syndrome. *Am J Otolaryngol*. 2012; 33: 319-21.
290. Wood KL, Krishna CV and Thompson JP. Serotonin syndrome following lamotrigine overdose. *Clin Toxicol*. 2008; 46: 367-.
291. Wu CS, Tong SH, Ong CT, et al. Serotonin Syndrome Induced by Combined Use of Mirtazapine and Olanzapine Complicated with Rhabdomyolysis, Acute Renal Failure, and Acute Pulmonary Edema-A Case Report. *Acta Neurol Taiwan*. 2015; 24: 117-21.
292. Wu ML and Deng JF. Serotonin toxicity caused by moclobemide too soon after paroxetine-selegiline. *J Chin Med Assoc*. 2009; 72: 446-9.
293. Wu ML and Deng JF. Fatal serotonin toxicity caused by moclobemide and fluoxetine overdose. *Chang Gung Med J*. 2011; 34: 644-9.
294. Yacoub HA, Johnson WG and Souayah N. Serotonin syndrome after administration of milnacipran for fibromyalgia. *Neurology*. 2010; 74: 699-700.

295. Yates SJ, Ahuja N, Gartside SE, et al. Serotonin Syndrome following Introduction of Venlafaxine following Withdrawal of Phenelzine: Implications for Drug Washout Periods. *Ther Adv Psychopharmacol*. 2011; 1: 125-7.
296. Yee AH and Wijdicks EFM. A Perfect Storm in the Emergency Department. *Neurocrit Care*. 2010; 12: 258-60.
297. Yoshida K-i, Saka K, Shintani-Ishida K, et al. A case of fatal intoxication due to the new designer drug 25B-NBOMe. *Forensic Toxicology*. 2015; 33: 396-401.
298. Young P, Finn BC, Alvarez F, et al. [Serotonin syndrome: four report cases and review of the literature]. *An Med Interna*. 2008; 25: 125-30.
299. Zand L, Hoffman SJ and Nyman MA. 74-year-old woman with new-onset myoclonus. *Mayo Clin Proc*. 2010, p. 955-8.
300. Zhang XC, Siket M and Binder W. The pharma-fever that almost got away. *R I Med J (2013)*. 2016; 99: 29-31.
301. Zonneveld AM, Hagenaars M, Voermans NC, et al. Life-threatening serotonin syndrome following a single dose of a serotonin reuptake inhibitor during maintenance therapy with a monoamine oxidase inhibitor. *Ned Tijdschr Geneesk*. 2006; 150: 1081-4.
